# Supplementary material
Source: publisher site journal article supplement (https://www.dovepress.com/article/335142)
Supplement: Supplementary file 1 [file get_supplementary_file.php]

## Supplementary Table S1

### Questionnaire

#### Sociodemographic characteristics

|                        |                                     |
|------------------------|-------------------------------------|
| <b>Gender</b>          | Male                                |
|                        | Female                              |
| <b>Age</b>             | 10-19 years                         |
|                        | 20-29 years                         |
|                        | 30-39 years                         |
|                        | 40-49 years                         |
|                        | 50-59 years                         |
|                        | >60 years                           |
| <b>Living place</b>    | Rural                               |
|                        | Urban                               |
| <b>Social life</b>     | Living alone                        |
|                        | With family                         |
| <b>Education level</b> | Primary/Middle (0-8 yrs.)           |
|                        | Secondary/Intermediate (9-12 yrs.)  |
|                        | University degree ( $\geq 13$ yrs.) |

## Risk Factors and Lifestyle characteristics

|                                                                                          |                                         |
|------------------------------------------------------------------------------------------|-----------------------------------------|
| <b>BMI (Kg/m<sup>2</sup>)</b>                                                            | 18.5-24.9 (normal)                      |
|                                                                                          | 25-29.9 (overweight)                    |
|                                                                                          | 30-39.9 (obese)                         |
| <b>Any Past GIT disease history?</b><br><b>(Dyspepsia, Peptic Ulcer, Heartburn etc.)</b> | Yes                                     |
|                                                                                          | No                                      |
| <b>Smoking History</b>                                                                   | Yes (Former smoker or Current smoker)   |
|                                                                                          | No (Never Smoked)                       |
| <b>Chew Pan masala</b>                                                                   | Yes (Former chewer Or Current chewer)   |
|                                                                                          | No (Never Chewed)                       |
| <b>Frequently use NSAIDs</b>                                                             | Yes (Daily or $\geq 3$ times in a week) |
|                                                                                          | No (Rare $< 3$ times in a week)         |
| <b>Frequently use CCB/Nitrate</b>                                                        | Yes                                     |
|                                                                                          | No                                      |
| <b>Frequently consume soft drinks</b>                                                    | Yes (Daily or $\geq 3$ times in a week) |
|                                                                                          | No (Rare $< 3$ times in a week)         |
| <b>Frequently consume tea</b>                                                            | Yes (Daily or $\geq 3$ times in a week) |
|                                                                                          | No (Rare $< 3$ times in a week)         |
| <b>Frequently use of fried food</b>                                                      | Yes (Daily or $\geq 3$ times in a week) |
|                                                                                          | No (Rare $< 3$ times in a week)         |
| <b>Frequently eat pickles</b>                                                            | Yes (Daily or $\geq 3$ times in a week) |
|                                                                                          | No (Rare $< 3$ times in a week)         |
| <b>Frequently eat spicy meals</b>                                                        | Yes (Daily or $\geq 3$ times in a week) |
|                                                                                          | No (Rare $< 3$ times in a week)         |
